# Supplementary material
Source: Springer Nature journal article supplement (https://www.springermedizin.de/resource/supplementary/13075_2009_2818_MOESM6_ESM.pdf/9692952)

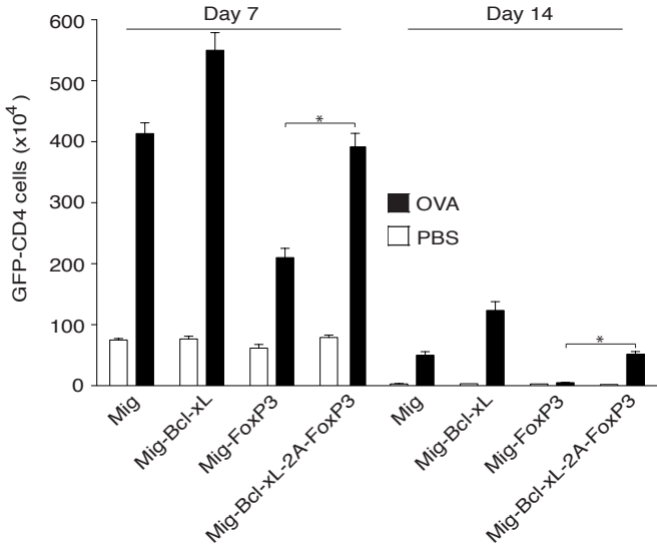

Supplement: MOESM6 [file 9692952]
